# Supplementary material for: Cardiovascular Disease Self-Management: Pilot Testing of an mHealth Healthy Eating Program
Source: MDPI journal article supplement (doi:10.3390/jpm4010088), 2014-03-19
Supplement: s1 [file s1]

## Supplementary File 1: Mobile phone usage survey questions

1.01 Do you have a mobile phone?

- Yes go to 1.02
- No go to 1.03

1.02 If yes, what functions do you use on your mobile phone? (Tick all that apply)

- Phone calls
- Text messaging
- Receive videos and/or photos
- Internet search
- Applications ('apps')
- IM (instant messaging)
- Social networks

1.03 Would you be interested in receiving continuing cardiac rehabilitation support via your mobile phone?

- Yes go to 1.05
- No go to 1.04

1.04 If no, why not?

1.05 If yes, which mobile phone formats would you like? (Tick all that apply)

- Text message
- Video
- Smartphone App
- Internet
- Other:

1.06 If there was a free program that sent text messages to a mobile phone from your cardiac rehabilitation program would you sign up?

- Yes go to 1.07
- No go to 1.08

1.07 If yes, how many messages would you like to receive?

- 2 messages per day
- 1 message per day
- 3-4 messages per week
- 1-2 messages per week

1.08 Which components of cardiac rehabilitation would you most like to receive messages about? (Tick all that apply)

- Taking medications
- Doing regular physical activity
- Eating healthy foods
- Stop smoking
- Stress management
- Other:

1.09 What advice would be most useful to you? (Tick all that apply)

- Healthy meal ideas and recipes
- Practical ideas to manage stress
- Setting goals
- Steps to achieve goals
- Exercise ideas
- How to overcome cigarette cravings
- How to remember to take your medications
- Healthy eating tips for takeaways and dining out
- Other:

1.10 Do you have regular access to the Internet?

- Yes go to 1.11
- No go to 1.12

1.11 If yes, how often do you use the internet?

- everyday
- 3 or more times per week
- once per week
- less than once per week

1.12 Do you have a Smartphone?

- Yes go to 1.13
- No

1.13 If yes, is it an:

- Android phone
- iPhone
- Other Smartphone:

**Supplementary File 2. Healthy eating text messages and targeted theoretical constructs.**

| <b>Weekly theme</b>                                | <b>SCT construct</b>                        | <b>Text message</b>                                                                                                                                         |
|----------------------------------------------------|---------------------------------------------|-------------------------------------------------------------------------------------------------------------------------------------------------------------|
| Lowering my blood cholesterol                      | N/A–Welcome                                 | CRPlus: Thanks for joining the CRPlus study. This is the first of many text messages you will receive to help you with heart healthy eating                 |
| Lowering my blood cholesterol                      | N/A–Study information                       | CRPlus: Visit the CRPlus website <a href="http://www.crplus.co.nz">www.crplus.co.nz</a> to watch videos and learn more about cholesterol and healthy eating |
| Lowering my blood cholesterol                      | Self-regulation                             | CRPlus: Have you seen a nutrition information panel on the back of a packaged food? Learn how to read these labels on the website                           |
| Lowering my blood cholesterol                      | Mastery experience                          | CRPlus: Small changes add up, such as a switch from butter to a margarine blend. Often the same price or cheaper. Less cost to your health too!             |
| Lowering my blood cholesterol                      | Goal setting                                | CRPlus: The key to goal setting is to set small goals, commit by writing them down, and revisit them regularly. Try this today on the website               |
| Lowering my blood cholesterol                      | Vicarious learning<br>Mastery experience    | CRPlus: Making the change to a healthy diet can be difficult, but it gets easier if you stick at. Watch the latest video for inspiration                    |
| Lowering my blood cholesterol                      | Outcome expectation                         | CRPlus: A benefit of eating less saturated fat is lower LDL “lous” cholesterol. This is good for your arteries and heart                                    |
| Choosing healthy meats and vegetarian alternatives | Social persuasion–<br>nutrition information | CRPlus: Removing the skin from chicken makes a low-fat heart healthy meal                                                                                   |
| Choosing healthy meats and vegetarian alternatives | Social persuasion–<br>nutrition information | CRPlus: Fish is lower in saturated fat than beef or chicken. Grill or bake fish for a heart healthy meal                                                    |
| Choosing healthy meats and vegetarian alternatives | Self-regulation                             | CRPlus: Check the website for tips on meat cooking. Easy changes like cutting off excess fat or skin before cooking reduces saturated fat                   |
| Choosing healthy meats and vegetarian alternatives | Goal setting Social<br>persuasion           | CRPlus: Try replacing red meat with fish. Canned fish counts. See if you can make this change twice this week. You can do it!                               |
| Choosing healthy meats and vegetarian alternatives | Vicarious learning                          | CRPlus: An easy way to eat less saturated fat: cut fat off meat & choose lean cuts like prime mince. See the latest video and recipe on the website         |
| Choosing healthy meats and vegetarian alternatives | Social persuasion–<br>nutrition information | CRPlus: Lean cuts of meat are lower in fat, but can be more expensive. Save \$ by eating smaller portions and fill up with veggies that are in season       |
| Choosing healthy meats and vegetarian alternatives | Social support                              | CRPlus: Encourage the family to eat healthy with you. Explain why it’s important & ask them to help you set and reach your goals                            |
| Choosing healthy milk and milk products            | Social persuasion–<br>nutrition information | CRPlus: If you use coconut cream mix with low fat milk or water to reduce saturated fat & coconut cream goes lot further too!                               |
| Choosing healthy milk and milk products            | Vicarious learning                          | CRPlus: For more healthy eating tips, watch the latest video and see new recipes on the website                                                             |
| Choosing healthy milk and milk products            | Environmental control                       | CRPlus: Out for a cup of coffee? Try a trim version of your favourite instead,<br>or a long black                                                           |
| Choosing healthy milk and milk products            | Goal setting                                | CRPlus: Set yourself a healthy eating goal each week. Check the website for ideas. This will help you to monitor your progress.                             |
| Choosing healthy milk and milk products            | Mastery experience                          | CRPlus: Little steps lead to the best long term progress. Start with one new change per week. Make that your goal!                                          |
| Choosing healthy milk and milk products            | Social support                              | CRPlus: Dairy doesn’t mean unhealthy. Ask the main shopper in your house to choose low fat versions of your favorite yogurt and cheese                      |
| Choosing healthy milk and milk products            | Mastery experience                          | CRPlus: It can be hard to make nutrition changes, especially if you don’t like the taste. It’s easier to make small changes gradually                       |

**Supplementary File 2. Cont.**

| <b>Weekly theme</b> | <b>SCT construct</b>         | <b>Text message</b>                                                                                                                                 |
|---------------------|------------------------------|-----------------------------------------------------------------------------------------------------------------------------------------------------|
| Packaged foods      | Self-regulation              | CRPlus: Cut down saturated fat by reaching for a piece of fruit for your snack or dessert today                                                     |
| Packaged foods      | Environmental control        | CRPlus: Fast food can be part of a healthy diet. Limit yourself to occasional trips and split a meal or order a small size                          |
| Packaged foods      | Outcome expectation          | CRPlus: Think you don't have the willpower to avoid treat foods or takeaways? Think of your body, your mind, and being around for your family       |
| Packaged foods      | Social support               | CRPlus: Show your family how to check saturated fat on a food label of a favourite snack. Aim for less than 1%, that means 1g/100g serving          |
| Packaged foods      | Goal setting                 | CRPlus: You could save \$5/day when you make your own lunch. That's \$1200/yr! That's a 7 day trip to Fiji!                                         |
| Packaged foods      | Somatic and emotional states | CRPlus: Too tired after work to cook a healthy dinner? Try getting up a bit earlier and prepare it in the morning or cook on the weekend and freeze |
| Packaged foods      | N/A—Closing message          | CRPlus: It's day 28, you have finished the program. Congratulations! Thank you for your participation                                               |
| Packaged foods      | N/A—Closing message          | CRPlus: We hope you enjoyed the program. We would appreciate your feedback. Check your email account for the link to the final survey               |

© 2014 by the authors; licensee MDPI, Basel, Switzerland. This article is an open access article distributed under the terms and conditions of the Creative Commons Attribution license (<http://creativecommons.org/licenses/by/3.0/>).
